# Supplementary material for: Discovery of a Novel β-xylosidase with Xylanase Activity and Its Application in the Production of Xylitol from Corncob Xylan
Source: MDPI journal article supplement (doi:10.3390/fermentation9070606), 2023-06-28
Supplement: s1 [file s1]

Archive with 1 entries (1 files):
- fermentation-2450530-supplementary.pdf
