# Supplementary material for: Discovery of a Novel β-xylosidase with Xylanase Activity and Its Application in the Production of Xylitol from Corncob Xylan
Source: MDPI journal article supplement (doi:10.3390/fermentation9070606), 2023-06-28
Supplement: s1 [file s1 › fermentation-2450530-supplementary.pdf]

Supplementary material:

# Discovery of a Novel $\beta$ -xylosidase with Xylanase Activity and Its Application in the Production of Xylitol from Corncob Xylan

Meng Liang <sup>1</sup>, Yu Lin <sup>1</sup>, Lixin Sun <sup>1</sup>, Hao Pang <sup>2</sup>, Hang Wei <sup>1</sup>, Ribo Huang <sup>1,2</sup>, Yutuo Wei <sup>1</sup> and Liqin Du <sup>1,\*</sup>

<sup>1</sup> Guangxi Research Center for Microbial and Enzymatic Technology, College of Life Science and Technology, Guangxi University, Daxue Road No. 100, Nanning 530005, China; lm9267@163.com (M.L.); wslinyu2022@163.com (Y.L.); sun980712@163.com (L.S.); weihanggx@163.com (H.W.); guruace@163.com (R.H.); weiyutuo@gxu.edu.cn (Y.W.)

<sup>2</sup> Guangxi Key Laboratory of Bio-Refinery, National Engineering Research Center for Non-Food Biorefinery, State Key Laboratory of Non-Food Biomass and Enzyme Technology, Guangxi Academy of Sciences, Daling Road No. 98, Nanning 530007, China; haopang@gxas.cn

\* Correspondence: duliqin@gxu.edu.cn

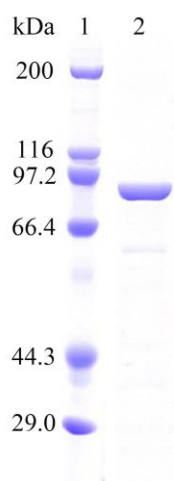

**Figure S1.** Analysis of the purified XYL4 by SDS-PAGE. Lane 1, molecular mass marker; lane 2, purified protein of XYL4.

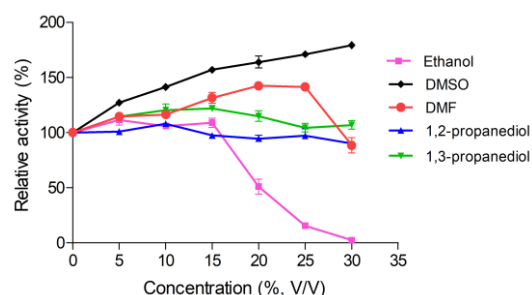

**Figure S2.** The effect of organic solvents on the activity of XYL4.

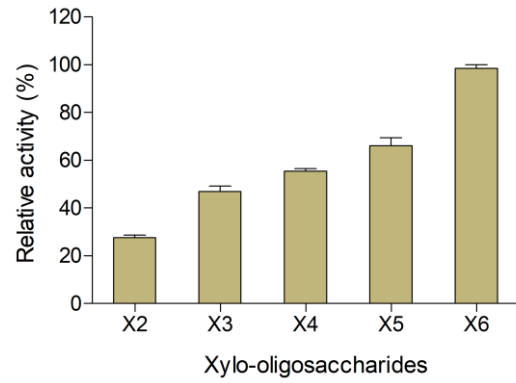

**Figure S3.** Hydrolytic activity of XYL4 toward xylo-oligosaccharides. Taking the hydrolytic activity toward xylohexaose (X6) as 100%, the relative activities toward xylopentose (X5), xylotetraose (X4), xylotriose (X3), and xylobiose (X2) were determined.

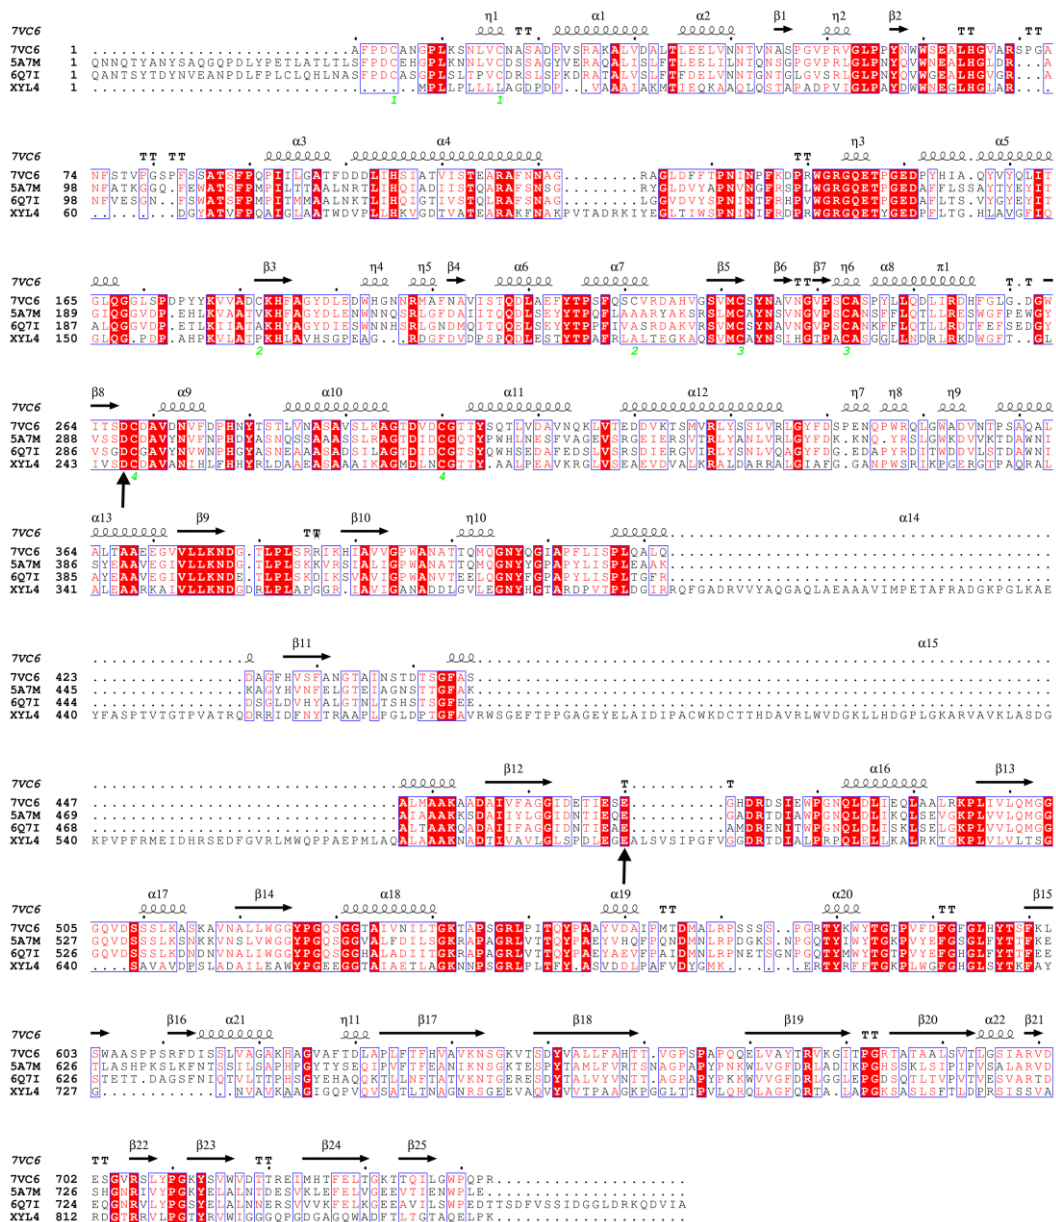

**Figure S4.** Amino acid sequence alignment of XYL4 with other GH3 β-xylosidases from *Hypocrea jecorina* (PDB: 5A7M), *Aspergillus niger* (6Q7I) and *Phanerochaete chrysosporium* (7VC6). The numbers flanking the sequences represented the amino acid positions of each sequence. Conserved residues

were shadowed in red. The predicted active site residues (nucleophile and general acid/base residue) were marked by arrowheads.

**Table S1.** The effect of carbohydrates, metal ions and chemical solvents on the activity of XYL4.

| Effectors         | Relative enzyme activity (%) |               |
|-------------------|------------------------------|---------------|
|                   | 5 mM                         | 20 mM         |
| Carbohydrates     |                              |               |
| Glucose           | 103.44 ± 0.02                | 89.58 ± 0.01  |
| Xylose            | 53.97 ± 0.01                 | 27.84 ± 0.02  |
| Fructose          | 114.46 ± 0.06                | 100.13 ± 0.02 |
| Arabinose         | 93.68 ± 0.05                 | 90.30 ± 0.03  |
| Maltose           | 98.87 ± 0.06                 | 92.40 ± 0.04  |
| Galactose         | 102.13 ± 0.01                | 94.21 ± 0.05  |
| Metal ions        |                              |               |
| K <sup>+</sup>    | 166.95 ± 1.33                | 172.26 ± 0.04 |
| Ca <sup>2+</sup>  | 132.89 ± 0.07                | 127.24 ± 0.04 |
| Cd <sup>2+</sup>  | 156.90 ± 1.04                | 15.81 ± 1.60  |
| Co <sup>2+</sup>  | 199.26 ± 0.74                | 45.34 ± 1.88  |
| Fe <sup>2+</sup>  | 128.05 ± 0.30                | 117.71 ± 0.74 |
| Zn <sup>2+</sup>  | 122.39 ± 0.57                | 122.7 ± 0.69  |
| Mn <sup>2+</sup>  | 104.44 ± 2.82                | 91.78 ± 0.51  |
| Mg <sup>2+</sup>  | 96.68 ± 0.43                 | 98.89 ± 0.83  |
| Cu <sup>2+</sup>  | 94.75 ± 0.54                 | 44.55 ± 0.67  |
| Chemical solvents |                              |               |
| Imidazole         | 96.22 ± 1.50                 | 85.09 ± 1.35  |
| Urea              | 96.24 ± 1.12                 | 94.67 ± 0.6   |
| DTT               | 68.38 ± 1.1                  | 64.92 ± 1.69  |
| CTAB              | 147.14 ± 0.97                | 132.07 ± 0.18 |
| EDTA              | 97.80 ± 0.98                 | 90.47 ± 0.64  |
| SDS               | 0.51 ± 0.02                  | 0             |
